# Supplementary material for: Manipulating all-pH hydrogen evolution kinetics on metal sulfides through one-pot simultaneously derived multi-interface engineering and phosphorus doping
Source: Royal Society of Chemistry journal article supplement (doi:10.1039/d1ta07670a), 2021-01-01
Supplement: d1ta07670a1.pdf [file d1ta07670a1.pdf]

**Manipulating all-pH hydrogen evolution kinetics on metal sulfides through one-pot simultaneously derived multi-interface engineering and phosphorus doping**

Haiqing Wang <sup>a,\*</sup>, Mingjun Ma <sup>a</sup>, Junjun Li <sup>c</sup>, Zhicheng Zhang <sup>c,\*</sup>, Weijia Zhou <sup>a</sup>, Hong Liu <sup>a,b,\*</sup>

<sup>a</sup> Institute for Advanced Interdisciplinary Research (iAIR), University of Jinan, Jinan 250022, China.

<sup>b</sup> State Key Laboratory of Crystal Materials, Shandong University, Jinan 250100, PR China.

<sup>c</sup> Tianjin Key Laboratory of Molecular Optoelectronic Sciences, Department of Chemistry, School of Science, Tianjin University & Collaborative Innovation Center of Chemical Science and Engineering, Tianjin 300072, China.

\*Corresponding authors (emails: ifc\_wanghq@ujn.edu.cn; zczhang19@tju.edu.cn; [hongliu@sdu.edu.cn](mailto:hongliu@sdu.edu.cn);) )

\*Corresponding authors (emails: ifc\_wanghq@ujn.edu.cn; [hongliu@sdu.edu.cn](mailto:hongliu@sdu.edu.cn))

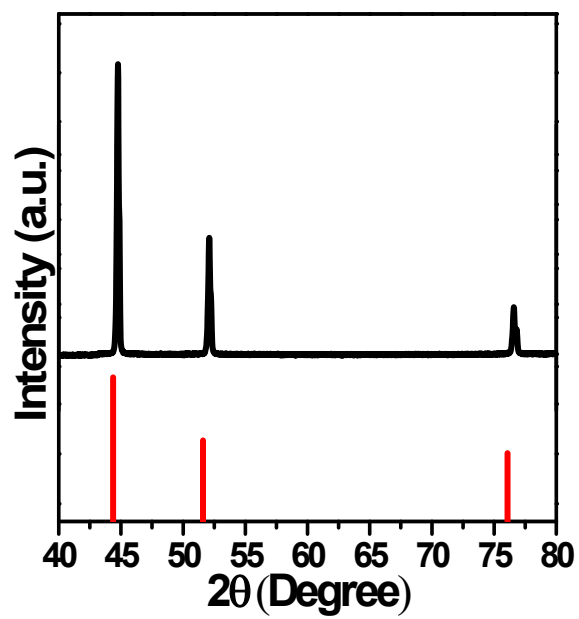

Figure S1 XRD of pristine nickel foam.

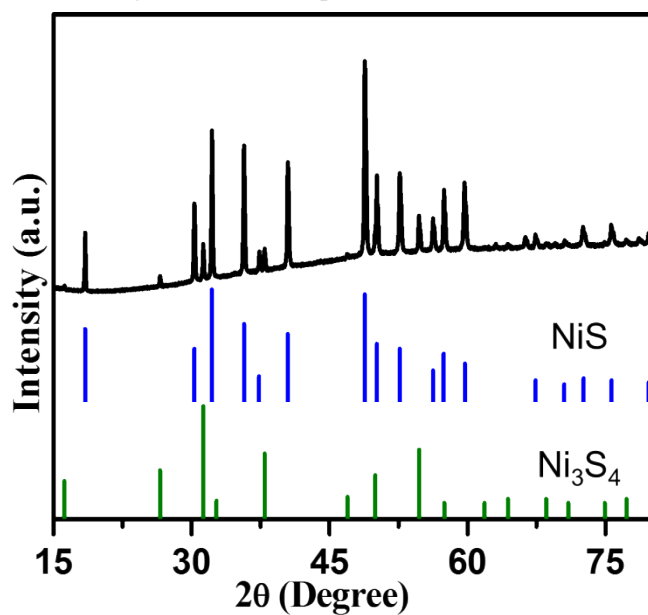

Figure S2 XRD of reference sample NiS/Ni<sub>3</sub>S<sub>4</sub>.

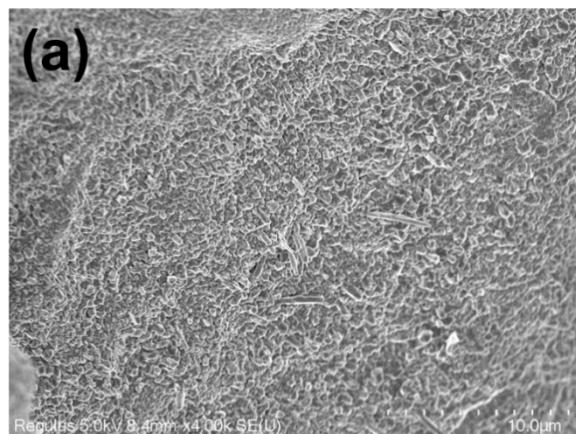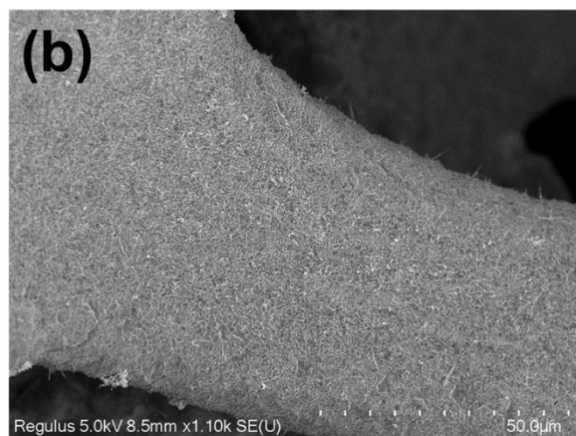

Figure S3 SEM images of reference sample NiS/Ni<sub>3</sub>S<sub>4</sub>.

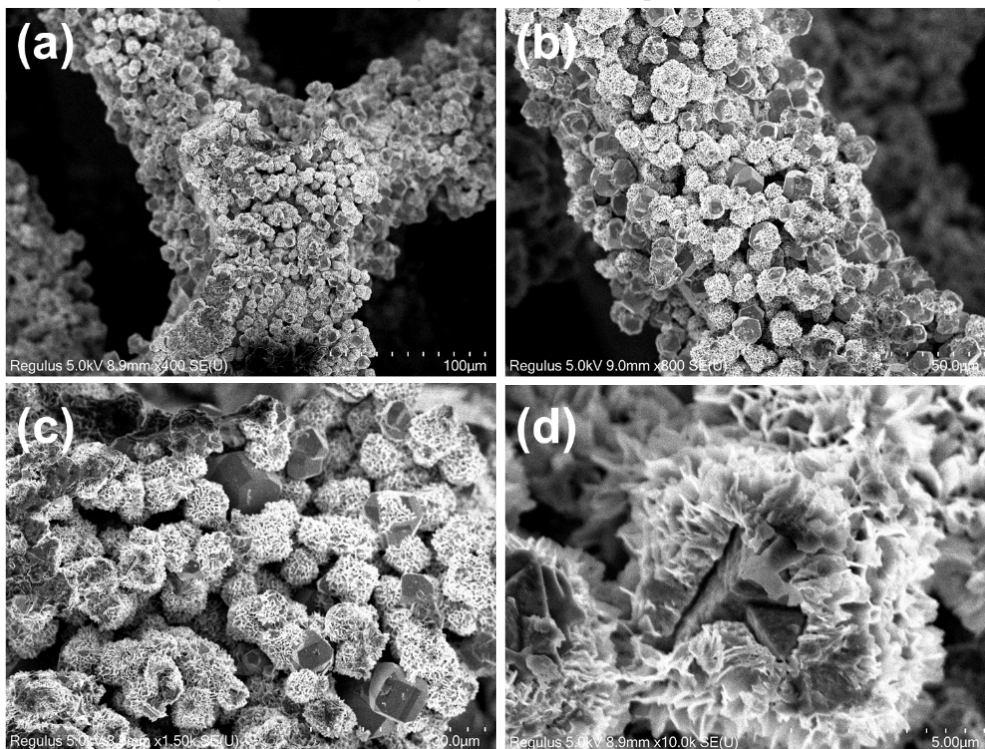

Figure S4 SEM images of NiS/WS<sub>2</sub>/Ni<sub>3</sub>S<sub>4</sub> prepared with 1g PW<sub>12</sub>.

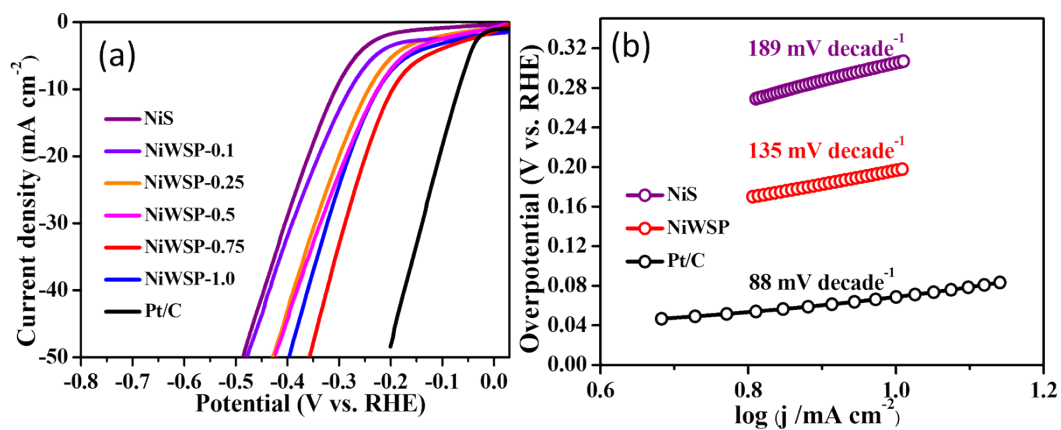

Figure S5 Linear sweep voltammetry (LSV) curve and Tafel plot in neutral condition.

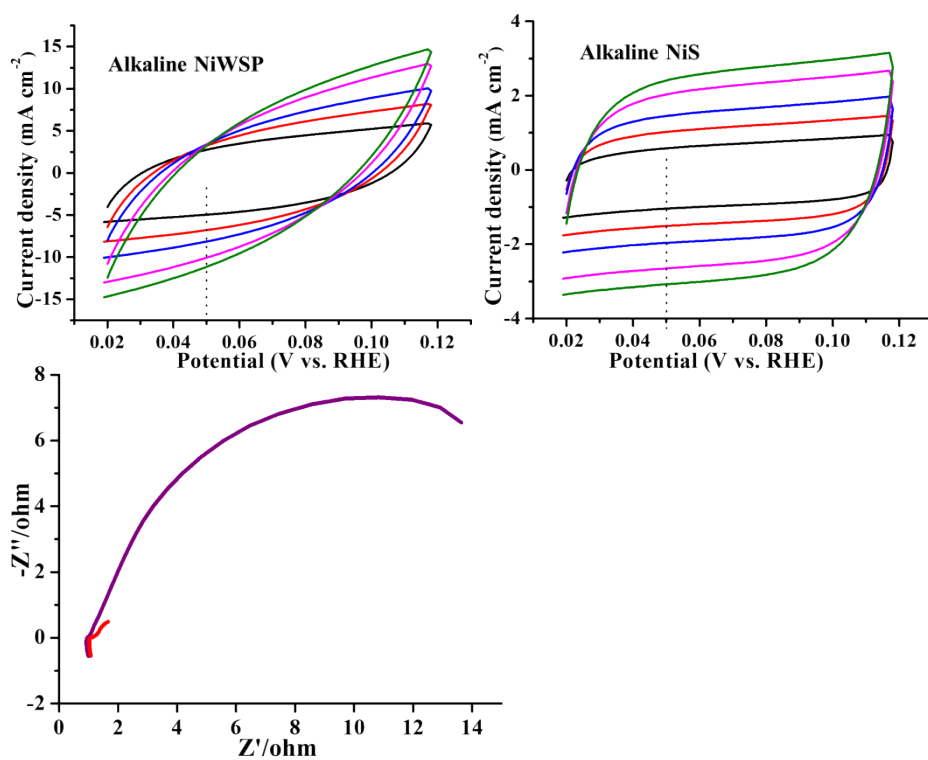

Figure S6 Non-Faradaic scan for double-layer capacitance in alkaline HER, and EIS Nyquist plots.

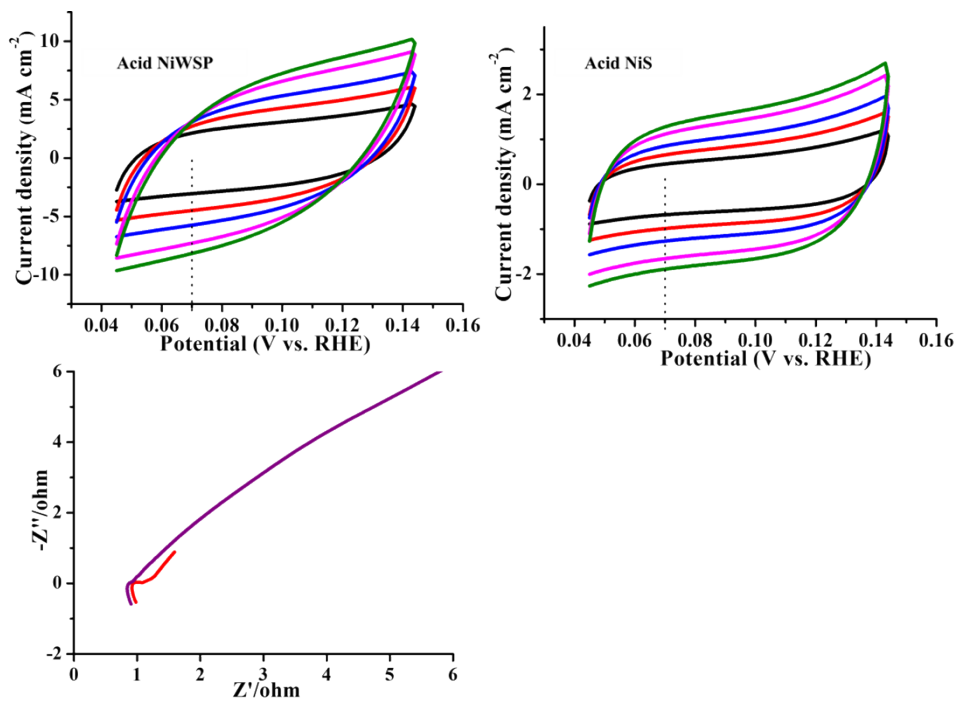

Figure S7 Non-Faradaic scan for double-layer capacitance in alkaline HER, and EIS Nyquist plots.

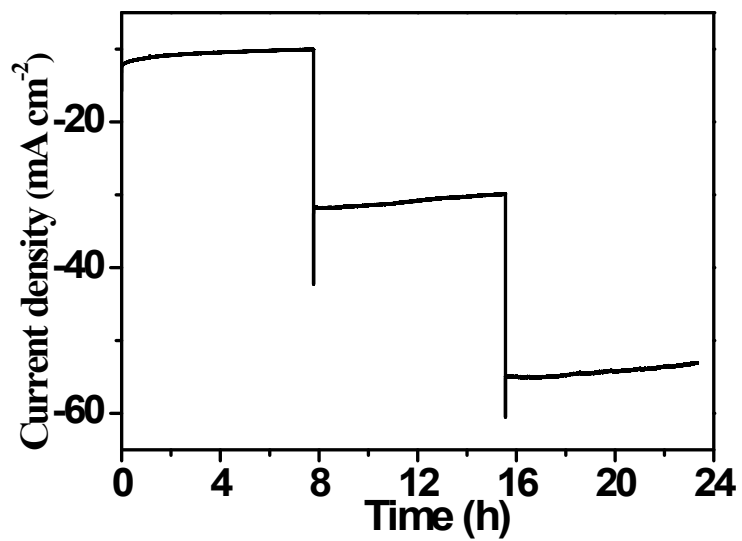

Figure S8 Time-dependent current density curve in neutral condition.

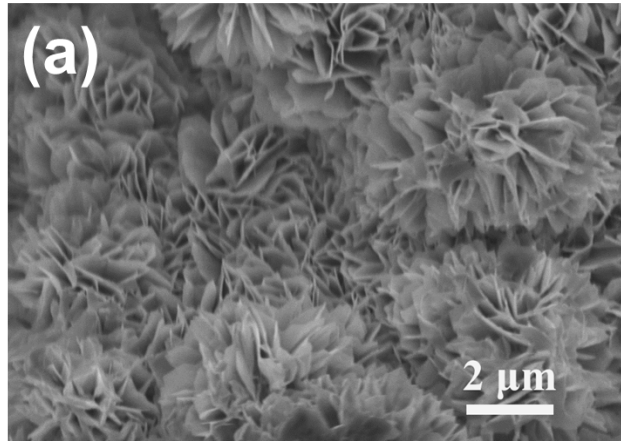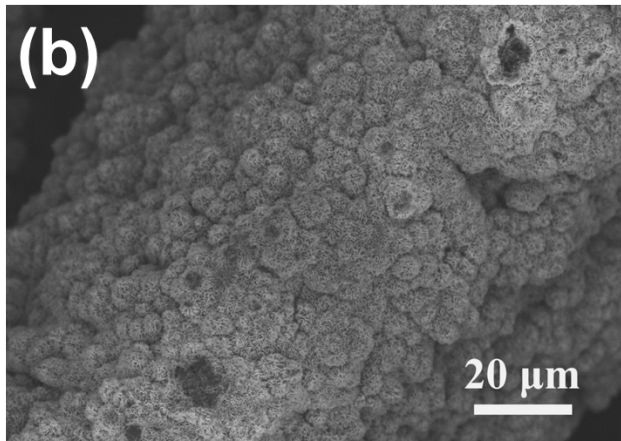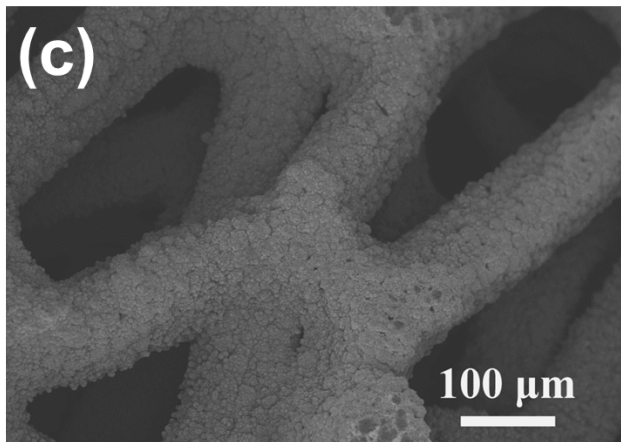

Figure S9 SEM images of NiS/WS<sub>2</sub>/Ni<sub>3</sub>S<sub>4</sub> after alkaline HER test.

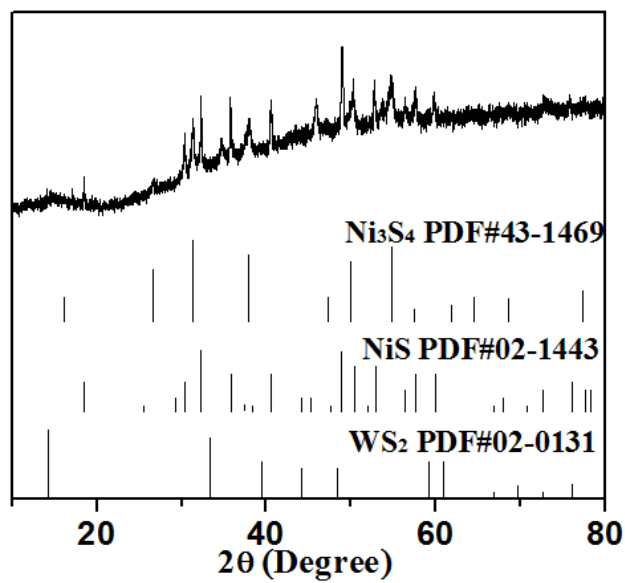

Figure S10 XRD pattern of NiS/WS<sub>2</sub>/Ni<sub>3</sub>S<sub>4</sub> after alkaline HER test.

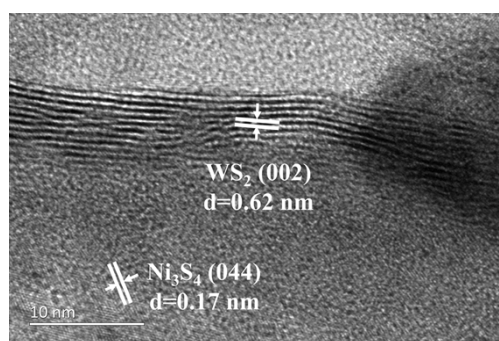

Figure 11 TEM image of of NiS/WS<sub>2</sub>/Ni<sub>3</sub>S<sub>4</sub> after alkaline HER test.
